## The role of cardiopulmonary exercise testing in a contemporary heart failure population

Garcia Bras P.; Valentim Goncalves A.; Reis J.; Pereira Da Silva T.; Ilhao Moreira R.; Viegas J.; Ferreira V.; Castelo A.; Rio P.; Silva S.; Martins C.; Coito S.; Capile E.; Soares R.; Ferreira R.

Hospital de Santa Marta, Lisbon, Portugal

**Funding Acknowledgements:** Type of funding sources: None.

**Introduction:** Cardiopulmonary exercise testing (CPET) is used for risk stratification in patients with chronic heart failure (CHF). However, there is a lack of information regarding CPET prognostic power in patients under new HF therapies such as sacubitril/valsartan, Mitraclip, IV iron or SGLT2 inhibitors. The aim of this study was to evaluate the prognostic value of CPET parameters in a contemporary subset of patients with optimal medical and device therapy for CHF.

**Methods:** Retrospective evaluation of patients with CHF submitted to CPET in a tertiary center. Patients were followed up for 24 months for the composite endpoint of cardiac death, urgent heart transplantation or left ventricular assist device.

CPET parameters, including peak oxygen consumption (pVO<sub>2</sub>) and VE/VCO<sub>2</sub> slope, were analysed and their predictive power was measured.

HF events were stratified according to cut-off values defined by the International Society for Heart and Lung Transplantation (ISHLT) guidelines: pVO<sub>2</sub> of ≤12 mL/Kg/min and VE/VCO<sub>2</sub> slope of >35.

**Results:** CPET was performed in 204 patients, from 2014 to 2018. Mean age was 59 ± 13 years, 83% male, with a mean left ventricular ejection fraction of 33 ± 8%, and a mean Heart Failure Survival Score of 8.6 ± 1.3.

The discriminative power of CPET parameters is displayed in the Table.

In patients with pVO<sub>2</sub> ≤12 mL/Kg/min, the composite endpoint occurred in 18% of patients. A pVO<sub>2</sub> value of ≤12 mL/Kg/min had a positive predictive power of 18% while pVO<sub>2</sub> >12 had a negative predictive power of 93%.

Regarding VE/VCO<sub>2</sub> slope >35, the composite endpoint occurred in 13% of patients.

A VE/VCO<sub>2</sub> slope value of >35 had a positive predictive power of 13% while VE/VCO<sub>2</sub> slope <35 had a negative predictive power of 94%.

**Conclusion:** Using ISHLT guideline cut-off values for advanced HF therapies patient selection, there was a reduced number of HF events (<20%) at 24 months in patients under optimal CHF therapy. While pVO<sub>2</sub> and VE/VCO<sub>2</sub> slope are still valuable parameters in risk stratification, redefining cut-off values may be necessary in a modern HF population.

Discriminative power of CPET parameters

| Parameters                            | HR; 95% CI          | AUC   | p-value |
|---------------------------------------|---------------------|-------|---------|
| Peak VO <sub>2</sub>                  | 0.824 (0.728-0.934) | 0.781 | 0.001   |
| Percent of predicted pVO <sub>2</sub> | 0.942 (0.907-0.978) | 0.774 | 0.002   |
| VE/VCO <sub>2</sub> slope             | 1.068 (1.031-1.106) | 0.756 | 0.008   |
| Cardiorespiratory optimal point       | 1.118 (1.053-1.188) | 0.746 | 0.004   |
| PETCO <sub>2</sub> maximum exercise   | 0.854 (0.768-0.950) | 0.775 | 0.003   |
| Ventilatory Power                     | 0.358 (0.176-0.728) | 0.796 | 0.002   |

**HR:** Hazard ratio, **AUC:** Area under the curve, **PETCO<sub>2</sub>:** end-tidal CO<sub>2</sub> pressure
